# Supplementary material for: Dietary Intake, Body Composition, and Oral Health Parameters among Female Patients with Primary Sjögren’s Syndrome
Source: MDPI journal article supplement (doi:10.3390/nu10070866), 2018-07-04
Supplement: s1 [file s1]

**Supplementary Table 2** Sources of energy and macronutrients for the pSS-patients

| Food group             | Energy | Protein | Fat | Saturated fat | Unsaturated fat |       |       | Cholesterol | Omega 3 | Omega 6 | Carbo-hydrates | Starch | Fibre | Sugar |
|------------------------|--------|---------|-----|---------------|-----------------|-------|-------|-------------|---------|---------|----------------|--------|-------|-------|
|                        |        |         |     |               | Trans-          | Mono- | Poly- |             |         |         |                |        |       |       |
| Bread                  | 14     | 12      | 5   | 2             | 0               | 4     | 10    | 0           | 7       | 11      | 27             | 53     | 28    | 2     |
| Grains                 | 7      | 6       | 4   | 1             | 0               | 4     | 8     | 0           | 6       | 8       | 13             | 17     | 13    | 5     |
| Cakes                  | 4      | 2       | 5   | 4             | 3               | 6     | 4     | 5           | 3       | 5       | 6              | 7      | 3     | 13    |
| Potatoes               | 3      | 1       | 2   | 1             | 3               | 2     | 2     | 0           | 1       | 2       | 6              | 11     | 5     | 0     |
| Vegetables             | 4      | 3       | 3   | 2             | 2               | 4     | 4     | 0           | 3       | 5       | 4              | 1      | 18    | 2     |
| Fruits and berries     | 10     | 4       | 5   | 2             | 1               | 6     | 11    | 0           | 5       | 11      | 18             | 3      | 20    | 12    |
| Meat                   | 9      | 22      | 13  | 13            | 8               | 15    | 10    | 17          | 5       | 11      | 1              | 1      | 0     | 0     |
| Fish                   | 8      | 18      | 9   | 6             | 2               | 10    | 16    | 16          | 36      | 9       | 3              | 3      | 2     | 0     |
| Egg                    | 2      | 4       | 4   | 3             | 1               | 4     | 3     | 37          | 2       | 4       | 0              | 0      | 0     | 0     |
| Milk products          | 7      | 8       | 7   | 11            | 15              | 5     | 1     | 4           | 1       | 1       | 8              | 1      | 1     | 19    |
| Cheese                 | 8      | 13      | 14  | 25            | 46              | 9     | 2     | 11          | 2       | 2       | 1              | 0      | 0     | 0     |
| Butter, margarine, oil | 7      | 1       | 18  | 16            | 15              | 21    | 20    | 6           | 17      | 22      | 0              | 0      | 0     | 1     |
| Sugar and sweets       | 4      | 1       | 5   | 7             | 2               | 4     | 1     | 1           | 0       | 2       | 6              | 0      | 4     | 29    |
| Beverages              | 8      | 3       | 1   | 2             | 0               | 1     | 0     | 1           | 0       | 0       | 6              | 1      | 1     | 11    |
| Supplements            | 1      | 0       | 1   | 1             | 0               | 2     | 3     | 1           | 10      | 0       | 0              | 0      | 0     | 0     |
| Spices                 | 0      | 0       | 0   | 0             | 0               | 0     | 0     | 0           | 0       | 0       | 0              | 0      | 1     | 0     |
| Various items          | 3      | 1       | 4   | 3             | 1               | 5     | 4     | 0           | 1       | 5       | 3              | 2      | 2     | 4     |

Values are percentages of total intake per day. *pSS* primary Sjögren's syndrome.
