# Supplementary material for: Dietary Intake, Body Composition, and Oral Health Parameters among Female Patients with Primary Sjögren’s Syndrome
Source: MDPI journal article supplement (doi:10.3390/nu10070866), 2018-07-04
Supplement: s1 [file s1]

**Supplementary Table 4** Sources of minerals for the pSS-patients

| <b>Food group</b>      | Calcium | Iron | Sodium | Potassium | Salt | Magnesium | Zinc | Selenium | Copper | Phosphate |
|------------------------|---------|------|--------|-----------|------|-----------|------|----------|--------|-----------|
| Bread                  | 3       | 16   | 16     | 7         | 15   | 12        | 12   | 7        | 14     | 12        |
| Grains                 | 3       | 8    | 5      | 4         | 6    | 7         | 5    | 2        | 9      | 7         |
| Cakes                  | 1       | 3    | 2      | 1         | 2    | 2         | 2    | 2        | 3      | 3         |
| Potatoes               | 1       | 3    | 1      | 8         | 1    | 3         | 1    | 0        | 4      | 2         |
| Vegetables             | 4       | 7    | 3      | 15        | 3    | 5         | 4    | 0        | 9      | 5         |
| Fruits and berries     | 5       | 8    | 2      | 18        | 1    | 11        | 4    | 2        | 15     | 5         |
| Meat                   | 2       | 12   | 17     | 9         | 16   | 4         | 20   | 12       | 5      | 12        |
| Fish                   | 4       | 4    | 13     | 10        | 13   | 5         | 5    | 43       | 6      | 11        |
| Egg                    | 2       | 6    | 2      | 1         | 2    | 1         | 3    | 8        | 1      | 5         |
| Milk products          | 23      | 2    | 3      | 8         | 3    | 5         | 6    | 3        | 3      | 12        |
| Cheese                 | 32      | 1    | 9      | 2         | 9    | 3         | 13   | 6        | 2      | 15        |
| Butter, margarine, oil | 0       | 0    | 5      | 0         | 5    | 0         | 0    | 1        | 0      | 1         |
| Sugar and sweets       | 2       | 3    | 0      | 1         | 0    | 2         | 1    | 0        | 4      | 2         |
| Beverages              | 7       | 8    | 4      | 13        | 4    | 9         | 2    | 1        | 4      | 6         |
| Supplements            | 7       | 16   | 0      | 0         | 0    | 29        | 19   | 13       | 19     | 0         |
| Spices                 | 0       | 1    | 5      | 0         | 5    | 0         | 0    | 0        | 0      | 0         |
| Various items          | 2       | 3    | 14     | 3         | 14   | 2         | 1    | 1        | 3      | 2         |

Values are percentages of total intake per day. *pSS* primary Sjögren's syndrome.
