# Supplementary material for: Dietary Intake, Body Composition, and Oral Health Parameters among Female Patients with Primary Sjögren’s Syndrome
Source: MDPI journal article supplement (doi:10.3390/nu10070866), 2018-07-04
Supplement: s1 [file s1]

**Supplementary Table 5** Compliance of the pSS-patients with the Nordic recommendations for food intakes

| <b>Foods</b>                            | <b>Recommended intake</b> | <b>Median (IQR)</b> | <b>Compliance<br/>%</b> |
|-----------------------------------------|---------------------------|---------------------|-------------------------|
| Vegetables, fruit and berries           | $\geq 500$ g/d            | 365 (299)           | 30                      |
| Vegetables                              | $\geq 250$ g/d            | 85 (141)            | 0                       |
| Fruits and berries                      | $\geq 250$ g/d            | 258 (236)           | 55                      |
| Fish, pure <sup>a</sup>                 | $\geq 300$ -450 g/week    | 53 (103)            | 50                      |
| Fatty fish <sup>b</sup>                 | $\geq 200$ g/week         | 11 (61)             | 30                      |
| Red meat, pure + processed <sup>c</sup> | <500 g/week               | 46 (69)             | 70                      |
