# Supplementary material for: Dietary Intake, Body Composition, and Oral Health Parameters among Female Patients with Primary Sjögren’s Syndrome
Source: MDPI journal article supplement (doi:10.3390/nu10070866), 2018-07-04
Supplement: s1 [file s1]

**Supplementary Table 1** Intake of micronutrients per 10 MJ among the pSS-patients and the N3-reference group

| Nutrient, unit                 | pSS (n=20)     |                  | N3 (n=761)     |                  |
|--------------------------------|----------------|------------------|----------------|------------------|
|                                | Median (IQR)   |                  | Median (IQR)   |                  |
|                                | No supplements | With supplements | No supplements | With supplements |
| Vitamin A, µg/d                | 903 (446)      | 1259 (857)       | 899 (447)      | 1067 (680)       |
| Retinol, mg/d                  | 524 (336)      | 639 (706)        | 499 (331)      | 622 (523)        |
| Beta-carotene, mg/d            | 3063 (2662)    | 3185 (2400)      | 2946 (3814)    | 3040 (3825)      |
| Vitamin D, µg/d                | 6.6 (5.3)      | 14.7 (13.2)      | 5.9 (4.9)      | 8.8 (10.7)       |
| Vitamin E, mg/d                | 16.1 (3.3)     | 23.1 (12.3)      | 14.4 (6.0)     | 19.1 (14.3)      |
| Thiamine, mg/d                 | 1.6 (0.4)      | 2.2 (1.8)        | 1.8 (0.6)      | 2.0 (1.0)        |
| Riboflavin, mg/d               | 1.9 (0.7)      | 2.6 (1.9)        | 2.3 (0.9)      | 2.6 (1.3)        |
| Niacin, mg/d                   | 22.2 (10.1)    | 28.2 (28.2)      | 22.9 (10.2)    | 25.8 (14.0)      |
| Vitamin B <sub>6</sub> , mg/d  | 1.9 (1.0)      | 2.4 (2.7)        | 1.8 (0.8)      | 2.1 (1.4)        |
| Folate, µg/d                   | 314 (129)      | 351 (148)        | 305 (100)      | 338 (146)        |
| Vitamin B <sub>12</sub> , µg/d | 5.7 (6.5)      | 7.1 (8.2)        | 6.9 (4.3)      | 7.5 (4.9)        |
| Vitamin C, mg/d                | 99 (61)        | 151 (204)        | 130 (117)      | 154 (137)        |
| Calcium, mg/d                  | 997 (320)      | 1012 (593)       | 1011 (532)     | 1053 (557)       |
| Iron, mg/d                     | 10.9 (4.1)     | 11.5 (5.4)       | 11.6 (3.7)     | 12.2 (5.0)       |
| Sodium, g/d                    | 3.1 (1.1)      | 3.1 (1.2)        | 3.0 (1.3)      | 3.0 (1.3)        |
| Potassium, g/d                 | 4.3 (1.1)      | 4.2 (1.1)        | 4.5 (1.5)      | 4.6 (1.5)        |
| Salt, g/d                      | 8.0 (2.7)      | 8.0 (2.7)        | 7.4 (3.0)      | 7.4 (3.0)        |
| Magnesium, mg/d                | 386 (131)      | 524 (340)        | 415 (119)      | 429 (132)        |
| Zinc, mg/d                     | 12.0 (3.3)     | 12.5 (4.9)       | 12.6 (4.0)     | 13.4 (5.4)       |
| Copper, mg/d                   | 1.5 (0.3)      | 1.5 (0.7)        | 1.4 (0.5)      | 1.4 (0.6)        |
| Phosphate, mg/d                | 1831 (418)     | 1828 (401)       | 1897 (528)     | 1900 (539)       |
| Selenium, mg/d                 | 60.5 (51.0)    | 63.5 (65.0)      | 54.0 (30.0)    | 59.2 (40.0)      |

pSS primary Sjögren's syndrome, IQR interquartile range.
