# Supplementary material for: Dietary Intake, Body Composition, and Oral Health Parameters among Female Patients with Primary Sjögren’s Syndrome
Source: MDPI journal article supplement (doi:10.3390/nu10070866), 2018-07-04
Supplement: s1 [file s1]

**Supplementary Table 6** Proportions of the pSS-patients and the N3-reference group complying with the Nordic recommendations for nutrient intakes<sup>a</sup>

|                                | <b>Recommended</b>     | <b>pSS (n=20)</b><br>% | <b>N3 (n=761)</b><br>% |
|--------------------------------|------------------------|------------------------|------------------------|
| <b>Macronutrients, E%</b>      |                        |                        |                        |
| Carbohydrate                   | 45-60                  | 30                     | 43                     |
| Sugar                          | <10                    | 85                     | 79                     |
| Fat                            | 25-40                  | 65                     | 3                      |
| Saturated fat                  | <10                    | 15                     | 18                     |
| Trans-unsaturated fat          | <1                     | 100                    | 100                    |
| Monounsaturated fat            | 10-20                  | 100                    | 74                     |
| Polyunsaturated fat            | 5-10                   | 85                     | 58                     |
| Protein                        | 10-20                  | 90                     | 78                     |
| Fibre, g/d                     | 25                     | 20                     | 33                     |
| Alcohol                        | <5                     | 70                     | 80                     |
| <b>Vitamins, unit</b>          |                        |                        |                        |
| Vitamin A, µg/d                | 700                    | 60                     | 48                     |
| Vitamin D, µg/d                | 10                     | 25                     | 9                      |
| Vitamin E mg/d                 | 8                      | 90                     | 77                     |
| Thiamine, mg/d                 | 1.1 (1.0) <sup>b</sup> | 75                     | 75                     |
| Riboflavin, mg/d               | 1.2                    | 75                     | 85                     |
| Niacin, mg/d                   | 14 (13) <sup>b</sup>   | 80                     | 72                     |
| Vitamin B <sub>6</sub> , mg/d  | 1.2 (1.3)              | 75                     | 68                     |
| Folate, µg/d                   | 400 (300) <sup>b</sup> | 5                      | 5                      |
| Vitamin B <sub>12</sub> , µg/d | 2                      | 95                     | 96                     |
| Vitamin C, mg/d                | 75                     | 55                     | 63                     |
| <b>Minerals, unit</b>          |                        |                        |                        |
| Calcium, mg/d                  | 800                    | 45                     | 47                     |
| Iron, mg/d                     | 15 (9) <sup>b</sup>    | 15                     | 8                      |
| Potassium, g/d                 | 3.1                    | 70                     | 67                     |
| Magnesium, mg/d                | 280                    | 80                     | 64                     |
| Zinc, mg/d                     | 7                      | 85                     | 81                     |
| Copper, mg/d                   | 0.9                    | 90                     | 65                     |
| Phosphate, mg/d                | 600                    | 95                     | 99                     |
| Selenium, µg/d                 | 50                     | 45                     | 37                     |

<sup>a</sup>Supplements are excluded.

<sup>b</sup>According to the Nordic Nutrition Recommendations for women aged 61-74 years.

pSS primary Sjögren's syndrome, E% percent of energy intake.
