# Supplementary material for: Dietary Intake, Body Composition, and Oral Health Parameters among Female Patients with Primary Sjögren’s Syndrome
Source: MDPI journal article supplement (doi:10.3390/nu10070866), 2018-07-04
Supplement: s1 [file s1]

**Supplementary Table 3** Sources of vitamins for the pSS-patients

| Food group             | Vitamin<br>A | Retinol | Beta-<br>carotene | Vitamin<br>D | Vitamin<br>E | Thiamine | Riboflavin | Niacin | Vitamin<br>B <sub>6</sub> | Folate | Vitamin<br>B <sub>12</sub> | Vitamin<br>C |
|------------------------|--------------|---------|-------------------|--------------|--------------|----------|------------|--------|---------------------------|--------|----------------------------|--------------|
| Bread                  | 0            | 1       | 0                 | 0            | 6            | 13       | 4          | 8      | 5                         | 11     | 0                          | 0            |
| Grains                 | 0            | 0       | 0                 | 0            | 3            | 5        | 2          | 3      | 3                         | 3      | 0                          | 0            |
| Cakes                  | 2            | 4       | 0                 | 2            | 4            | 2        | 1          | 1      | 1                         | 2      | 0                          | 0            |
| Potatoes               | 1            | 1       | 2                 | 0            | 2            | 2        | 1          | 4      | 3                         | 3      | 0                          | 4            |
| Vegetables             | 19           | 2       | 81                | 1            | 7            | 4        | 2          | 5      | 5                         | 13     | 0                          | 26           |
| Fruits and berries     | 1            | 0       | 3                 | 0            | 6            | 7        | 6          | 6      | 13                        | 12     | 0                          | 31           |
| Meat                   | 8            | 13      | 0                 | 2            | 3            | 13       | 7          | 21     | 10                        | 2      | 4                          | 0            |
| Fish                   | 3            | 3       | 1                 | 18           | 8            | 4        | 4          | 13     | 10                        | 3      | 7                          | 0            |
| Egg                    | 6            | 10      | 0                 | 6            | 8            | 2        | 6          | 0      | 1                         | 5      | 2                          | 0            |
| Milk products          | 5            | 8       | 1                 | 1            | 1            | 4        | 10         | 1      | 2                         | 4      | 2                          | 1            |
| Cheese                 | 13           | 7       | 1                 | 0            | 1            | 1        | 6          | 1      | 1                         | 4      | 2                          | 0            |
| Butter, margarine, oil | 14           | 23      | 3                 | 9            | 13           | 0        | 1          | 0      | 0                         | 0      | 0                          | 0            |
| Sugar and sweets       | 0            | 0       | 0                 | 0            | 1            | 1        | 2          | 0      | 0                         | 0      | 0                          | 0            |
| Beverages              | 1            | 1       | 0                 | 0            | 0            | 2        | 11         | 9      | 3                         | 2      | 1                          | 1            |
| Supplements            | 25           | 24      | 4                 | 61           | 34           | 39       | 36         | 26     | 40                        | 33     | 81                         | 34           |
| Spices                 | 0            | 0       | 0                 | 0            | 0            | 0        | 0          | 0      | 0                         | 0      | 0                          | 0            |
| Various items          | 1            | 1       | 2                 | 0            | 4            | 1        | 1          | 2      | 2                         | 2      | 0                          | 1            |

Values are percentages of total intake per day. *pSS* primary Sjögren's syndrome.
